# Supplementary material
Source: PubMed Central journal article supplement (PMC4373332)
Supplement: jcmm0015-1319-SD1.pdf [file jcmm0015-1319-SD1.pdf]

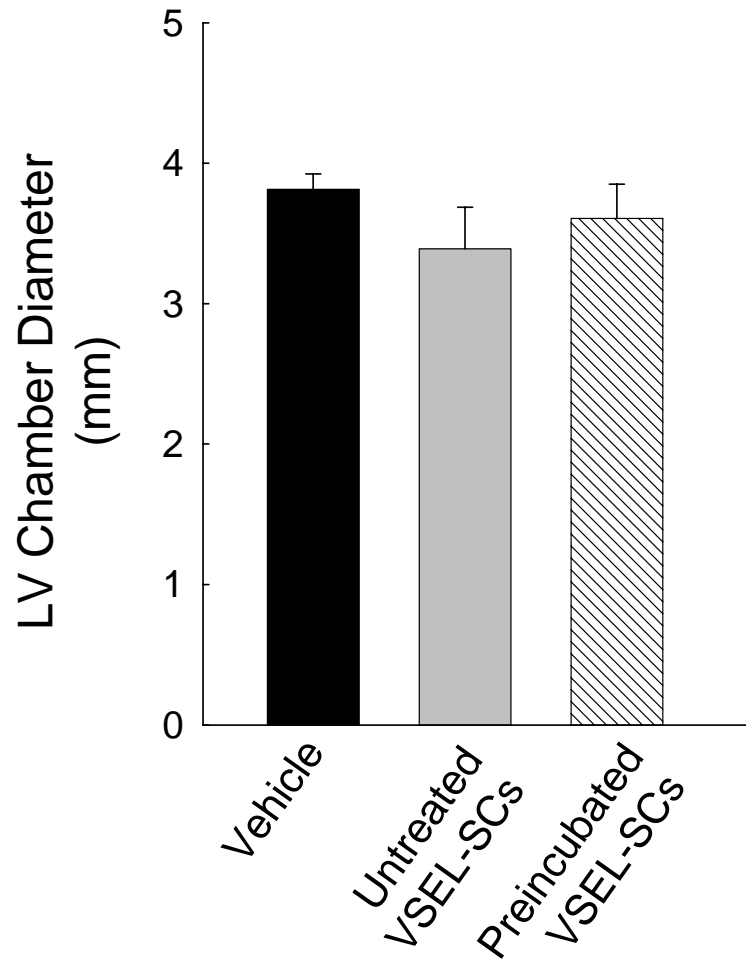

SUPPLEMENTAL FIGURE 1

**A**

Infarct Border Zone

Myocardial Capillary Density  
(per mm<sup>2</sup>)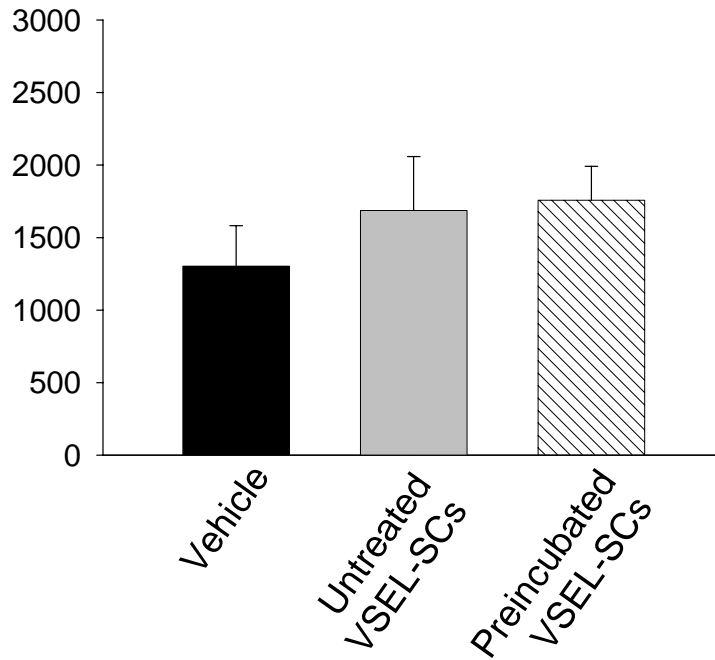**B**

Nonischemic Zone

Myocardial Capillary Density  
(per mm<sup>2</sup>)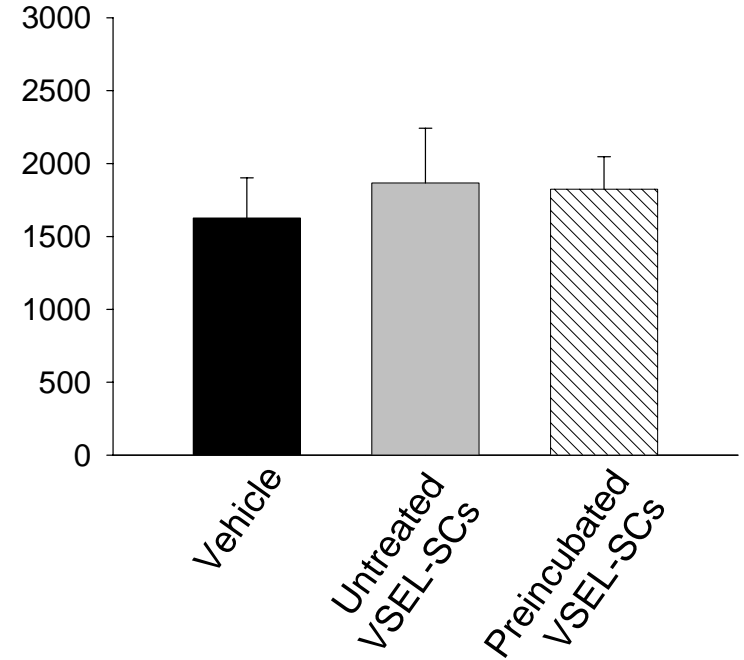

SUPPLEMENTAL FIGURE 2

**A**

Infarct Border Zone

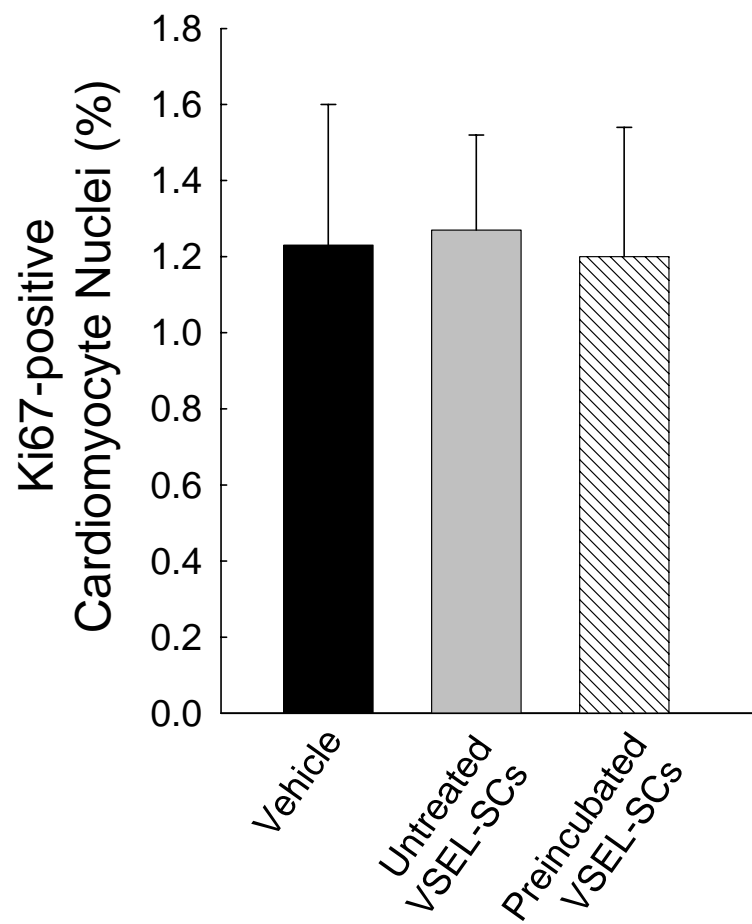**B**

Nonischemic Zone

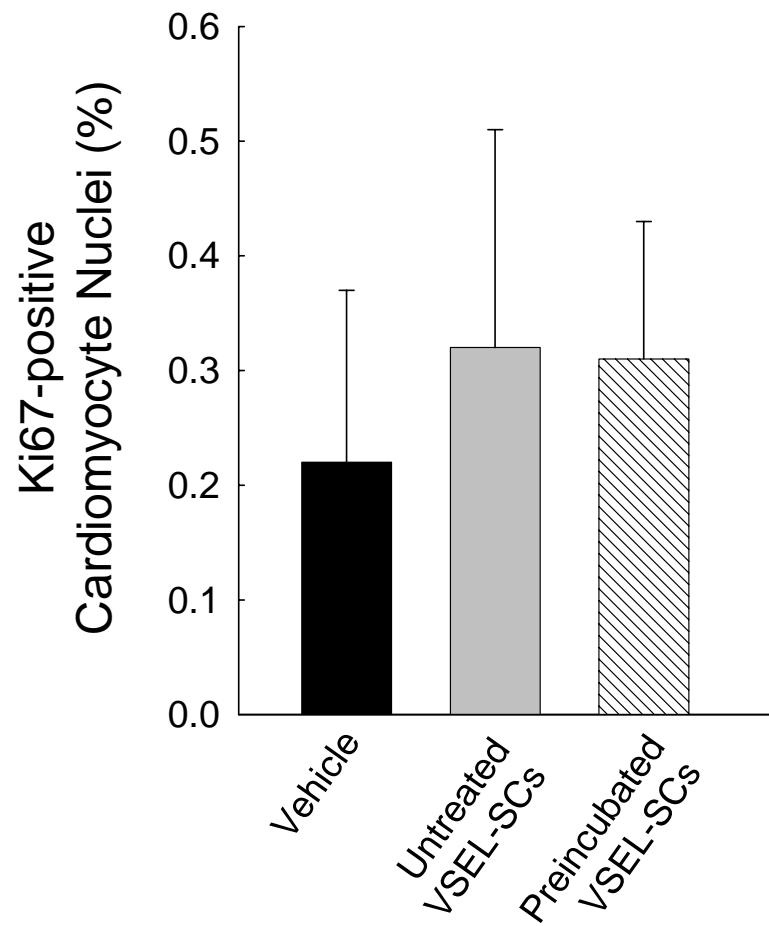

SUPPLEMENTAL FIGURE 3
